# Supplementary material for: Efficacy and Safety of Omarigliptin, a Novel Once-Weekly Dipeptidyl Peptidase-4 Inhibitor, in Type 2 Diabetes Mellitus: A Systematic Review and Meta-Analysis
Source: PubMed Central journal article supplement — Endocrinol Metab (Seoul). 2024 Feb 22;39(1):109–26. doi: 10.3803/EnM.2023.1839 (PMC10901664; doi:10.3803/enm.2023.1839), 2024-02-22
Supplement: enm-2023-1839-Supplemental-Fig-S1.pdf [file enm-2023-1839-Supplemental-Fig-S1.pdf]

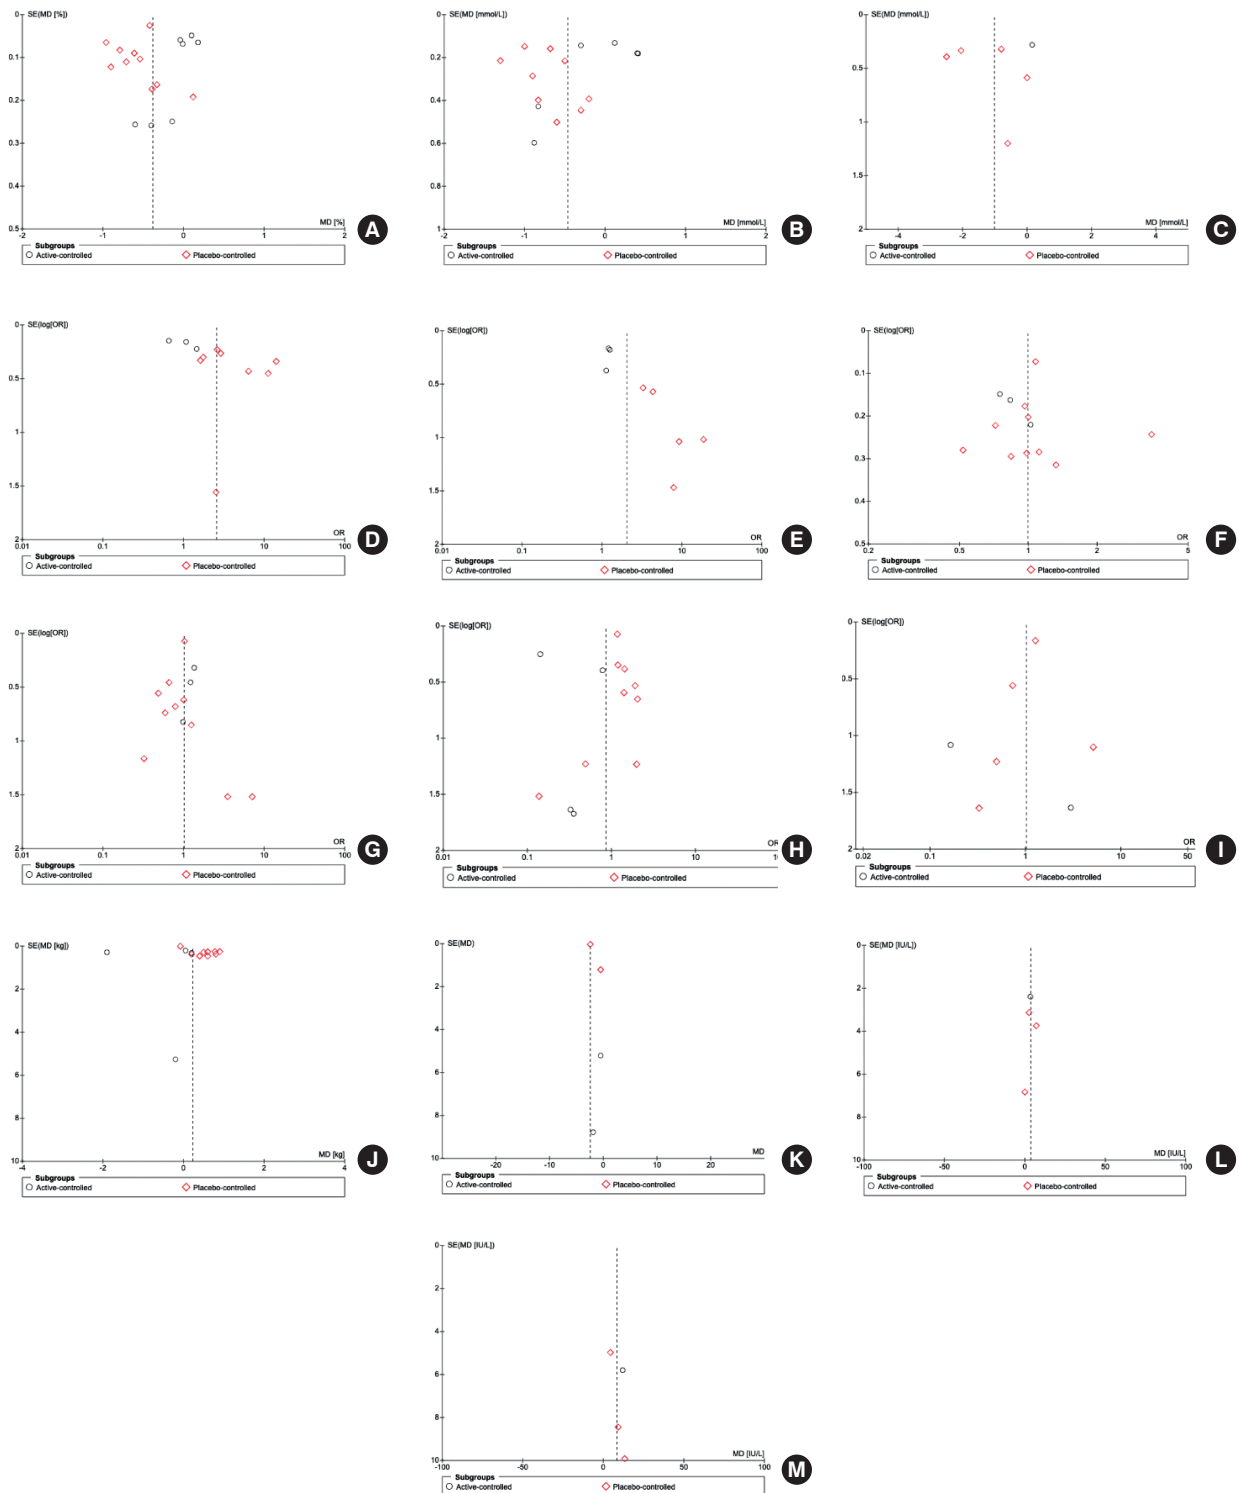

**Supplemental Fig. S1.** Funnel plots for the studies that included: (A) changes in hemoglobin A1c (HbA1c), (B) changes in fasting plasma glucose (FPG), (C) change in 2-hour postprandial glucose (PPG), (D) subjects who achieved HbA1c <7.0%, (E) subjects who achieved HbA1c <6.5%, (F) total adverse events (AEs), (G) serious AEs, (H) hypoglycemic events, (I) severe hypoglycemic events, (J) changes in body weight, (K) changes in estimated glomerular filtration rate (eGFR), (L) changes in serum amylase, and (M) changes in serum lipase. SE, standard error; MD, mean difference; OR, odds ratio.
